# Supplementary material
Source: publisher figshare collection journal article supplement (https://sage.figshare.com/ndownloader/files/17961665)
Supplement: Supplementary file 1 [file 17961665]

## The Cleft Palate – Craniofacial Journal

### Transfer of Copyright Agreement, Authorship Responsibility, Conflict of Interest

**Journal:** The Cleft Palate-Craniofacial Journal ("the Journal")

**Manuscript Number (if assigned):** CPLJ-19-0089

**Manuscript Title:** Marked Variation Exists Among Surgeons and Hospitals in the Use of Secondary Cleft Lip Surgery ("the Article")

**Authors:** Thomas Sitzman, Adam Carle, Pamela C. Heaton, Michael Helmuth ("the Author(s)")

The Authors hereby assign all copyright ownership of the Article named above in all forms and media now, or hereafter known, to the American Cleft Palate-Craniofacial Association ("the ACPA"). If the Article is not accepted for publication, this copyright agreement will terminate. The Authors grant the ACPA the rights to use their names and biographical data (including professional affiliation) in the Article and in it's or the Journal's promotion. Material prepared by employees of the U.S. Government is not subject to copyright.

I, a co-author, warrant that the Article:

- Is my/our own original work (with the exception of other copyright materials included with the written permission of the copyright owners and appropriately credited in the Article)
- Has not been published previously
- Is not under consideration for publication elsewhere
- Contains nothing defamatory or libelous and that all statements purporting to be facts are true

**Authorship Responsibility:** As an author, I certify that I participated sufficiently in 1) either experimental conception and design or data acquisition or data analysis and interpretation, AND 2) either manuscript preparation or critical review of the manuscript for important intellectual content, AND 3) final approval of the version to be submitted for publication, to take public responsibility for it.

**Conflict of Interest:** I have no commercial associations that might pose a conflict of interest in connection with the Article, except as disclosed in a separate letter. All funding sources supporting work contained in the Article and all institutional or corporate affiliations of the Authors are acknowledged in the Article.

The Authors retain the right(s) to:

- All proprietary rights, such as patent rights, other than copyright
- Make photocopies of all or part of the Article for internal use or teaching subject to an appropriate acknowledgement of the rights of the ACPA provided that such copies are not sold or otherwise used in any way that implies that the ACPA or the Journal endorses any recommended procedure or product
- Use, with consent of the ACPA (permission may not be unreasonably withheld) any original figures, tables, illustrations, or photographs from the Article in future works

**CERTIFICATION FOR GOVERNMENT WORKS-FOR-HIRE** Note: The following certification should be completed only if Author(s) were government employees at the time this Work was prepared and such Work was prepared as part of that author(s) official duties (please refer to your government job description and regulations governing the job).

**U.S. Government Employees:** If the Author(s) are U.S. Government Employees, this to certify that the Author(s) (except those listed below) were officers or employees of the U.S. Government at the time the above-titled Work was prepared and that the Work was prepared as part of their official duties and therefore is not subject to U.S. copyright protection.

**Other Government Employees:** If the Author(s) are government employees of a country which holds government, crown-owned or crown copyright for works created by its employees, this is to certify that Author(s) (except those listed below) were Government employees of \_\_\_\_\_ (insert name of country) at the time the above-titled Work was prepared and that the Work was prepared as part of their official duties. As such, the work is subject to government, crown-owned or crown copyright and is not transferred to ACPA. However, the Author(s) certify that ACPA may use, reproduce, publish, and distribute the Work and derivatives thereof, in all formats, throughout the world.

**List all non-government-employee authors** (Each non-government author and/or employer with rights in the copyright to

the Work should submit a separate standard copyright transfer form):

**TO BE SIGNED BY ALL AUTHORS.** This form may be photocopied for distribution to co-authors.

| Author Name                      | Signature                        | Date               |
|----------------------------------|----------------------------------|--------------------|
| James C. Heaton<br>Alan D. Helms | James C. Heaton<br>Alan D. Helms | 7-11-19<br>7-15-19 |
|                                  |                                  |                    |
|                                  |                                  |                    |
|                                  |                                  |                    |
|                                  |                                  |                    |
|                                  |                                  |                    |
|                                  |                                  |                    |

The Cleft Palate-Craniofacial Journal, 1504 East Franklin St., Suite 102, Chapel Hill, NC 27514-2820, USA
